# Supplementary material for: 1D Cs2AgBr3:Mn2+ crystals to realize high-resolution X-ray scintillation imaging
Source: Royal Society of Chemistry journal article supplement (doi:10.1039/d4tc05175k), 2025-01-01
Supplement: d4tc05175k1.pdf [file d4tc05175k1.pdf]

## Supplemental online material

### 1D Cs<sub>2</sub>AgBr<sub>3</sub>:Mn<sup>2+</sup> crystals to Realize High Resolution X-ray Scintillation Imaging

Tao Chen,<sup>a,#</sup> Dedan Mu,<sup>d,#</sup> Feng Lin,<sup>c,#</sup> Wenjun Tang,<sup>e</sup> Yuqing Zhou,<sup>a</sup> Xinyue Shi,<sup>a</sup> Changjiang Li,<sup>a</sup>  
Xuekai Jiang,<sup>a</sup> Xin Li,<sup>d</sup> Haiyuan Chen,<sup>e</sup> Tao Chen,<sup>\*b</sup>, Xuhui Xu<sup>\*d</sup> and Chong Wang<sup>\*c</sup>

<sup>a</sup>Key Laboratory of Inorganic Functional Materials and Huangshan Technology Innovation Center for Green Chemical Engineering and New Materials, School of Chemistry and Chemical Engineering, Huangshan University, Huangshan, 245041, P. R. China

<sup>b</sup>Department of Materials Science and Engineering, School of Chemistry and Materials Science, University of Science and Technology of China, Hefei 230026, P. R. China  
Email: tchenmse@ustc.edu.cn (T. Chen)

<sup>c</sup>Yunnan Key Laboratory of Electromagnetic Materials and Devices, School of Materials and Energy, Yunnan University, Kunming 650500, P. R. China  
Email: cwang@ynu.edu.cn (C. Wang)

<sup>d</sup>School of Materials Science and Engineering, Kunming University of Science and Technology, Kunming 650093, P. R. China  
Email: xuxuh07@kust.edu.cn (X. H. Xu)

<sup>e</sup>School of Materials and Energy, University of Electronic Science and Technology of China, Chengdu 611731 P. R. China

<sup>#</sup>These authors contributed equally to this work.

## **Experimental Section**

### **Materials**

Cesium bromide (CsBr) (99.9%), manganese (II) bromide hydrate ( $\text{MnBr}_2 \cdot 4\text{H}_2\text{O}$ ) (98%) and silver bromide (AgBr) (>99%) were purchased from Macklin. Hypophosphorous acid ( $\text{H}_3\text{PO}_2$ , 50 wt.% in  $\text{H}_2\text{O}$ ) was purchased from Macklin. Acetone ( $\text{C}_3\text{H}_6\text{O}$ ) was purchased from Keshi Chemical Technology (99.5%). Hydriodic acid (HBr 48 wt.%) aqueous solution was purchased from Macklin.

### **The synthesis of $\text{Cs}_2\text{AgBr}_3$ crystals and $\text{Mn}^{2+}$ -doped $\text{Cs}_2\text{AgBr}_3$ crystals**

$\text{Cs}_2\text{AgBr}_3$  crystals were synthesized by mixing 8 mmol CsBr (1.7025 g) and 4 mmol AgBr (0.75108 g) and 200  $\mu\text{L}$   $\text{H}_3\text{PO}_2$  into 6.5 mL HBr acid solution. The whole solution was heated to 100 °C and stirred for 6-8 hours to make all the solutes totally dissolved. Subsequently, the solution was slowly cooled at a cooling speed of 6 °C/h to room temperature. Large quantities of  $\text{Cs}_2\text{AgBr}_3$  crystals were precipitated from the solution. After reaction,  $\text{Cs}_2\text{AgBr}_3$  crystals were washed with acetone for several times to remove all the surface impurities. Finally,  $\text{Cs}_2\text{AgBr}_3$  crystals were dried at oven at 50 degrees for further characterization and tests. The synthetic procedures of  $\text{Mn}^{2+}$  doped  $\text{Cs}_2\text{AgBr}_3$  crystals are identical to the  $\text{Cs}_2\text{AgBr}_3$  synthetic process except for partially replacing the  $\text{Ag}^+$  atoms with  $\text{Mn}^{2+}$  atoms with the molar ratios of 2.5%, 5%, 7.5%, 10%, respectively.

### **The $\text{Cs}_2\text{AgBr}_3:5\%\text{Mn}^{2+}$ @PMMA composite film fabrication**

1.6 g PMMA was added into 10 mL toluene, and stirred fiercely at 60 °C to make the PMMA totally dissolved. The  $\text{Cs}_2\text{AgBr}_3:5\%\text{Mn}^{2+}$  crystals were hand-ground into powder, and subsequently 0.9 g  $\text{Cs}_2\text{AgBr}_3:5\%\text{Mn}^{2+}$  powder was added into the PMMA solution and stirred for another 3 hours to obtain homogeneous solution. About 7 mL of the above prepared  $\text{Cs}_2\text{AgBr}_3:5\%\text{Mn}^{2+}$ @PMMA composite colloids were dropped and coated on a pre-cleaned flat glass-plate. And finally, the plate was put on the heating

plate at 50 °C for 8 hours to remove the organic solvents. After drying, peeling off the Cs<sub>2</sub>AgBr<sub>3</sub>:5%Mn<sup>2+</sup>@PMMA composite film from the glass-plate carefully for tests.

### DFT Calculations

All spin-polarized DFT calculations were performed using the Vienna Ab initio Simulation Package (VASP)<sup>1</sup> based on the generalized gradient approximation of the Perdew–Burke–Ernzerhof functional.<sup>2</sup> The interactions between core and valence electrons were described by the projector-augmented wave method<sup>3</sup> with a plane wave energy cutoff of 550 eV. The total energy tolerance was 10<sup>-7</sup> eV, and the force tolerance was 0.01 eV Å<sup>-1</sup>. The electronic occupancies were determined by Gaussian smearing with a smearing width of 0.10 eV. The spin-polarization incorporated within the calculations indeed facilitates the consideration of spin-biasing effects. Dipole corrections were added along the z-direction. The DFT-D3 method of Grimme was used to calculate van der Waals corrections.<sup>4</sup> The data obtained was processed using VASPkit<sup>5</sup> to generate the results, and visualized using VESTA.<sup>6</sup>

### Characterization Methods

XRD patterns of the samples were recorded on DX-2700BH X-ray diffractometer with a Cu K $\alpha$  source. The UV-vis absorption spectra of the Cs<sub>3</sub>Cu<sub>2</sub>I<sub>5</sub> films were conducted at UV-Lambda 650s UV-vis spectrometer. The steady-state photoluminescence (PL) spectra and time-resolved PL (TRPL) decay were recorded on FLS1000 (UK) with an excitation wavelength of 366 nm. The time-resolved PL decay curves were fitted by a double exponential equation:

$$I(t) = I_0 + A_1 \exp\left(\frac{-t}{\tau_1}\right) + A_2 \exp\left(\frac{-t}{\tau_2}\right)$$

where  $I$  is the luminescence intensity,  $t$  is the time,  $A_1$  and  $A_2$  are fitting constants, and the short and long fluorescence lifetimes of the exponential component are denoted as  $\tau_1$  and  $\tau_2$ , respectively. The average lifetime is calculated by:

$$\tau_{ave} = \frac{A_1 * \tau_1^2 + A_2 * \tau_2^2}{A_1 * \tau_1 + A_2 * \tau_2}$$

The RL spectra were tested using Ocean insight QE pro fluorescence spectrometer.

Power dependence PL spectra were performed on Horiba LabSpec 6 with an optical power meter.

**Table S1.** The results of ICP-MS measurements

| Molar feed ratio of $n_{(\text{Mn}^{2+})}/n_{(\text{Ag}^+)}$ | Actual molar ratio $n_{(\text{Mn}^{2+})}/n_{(\text{Ag}^+)}$ |
|--------------------------------------------------------------|-------------------------------------------------------------|
| 1:39                                                         | 0.23%                                                       |
| 1:19                                                         | 0.48%                                                       |
| 3:37                                                         | 0.71%                                                       |
| 1:9                                                          | 0.95%                                                       |

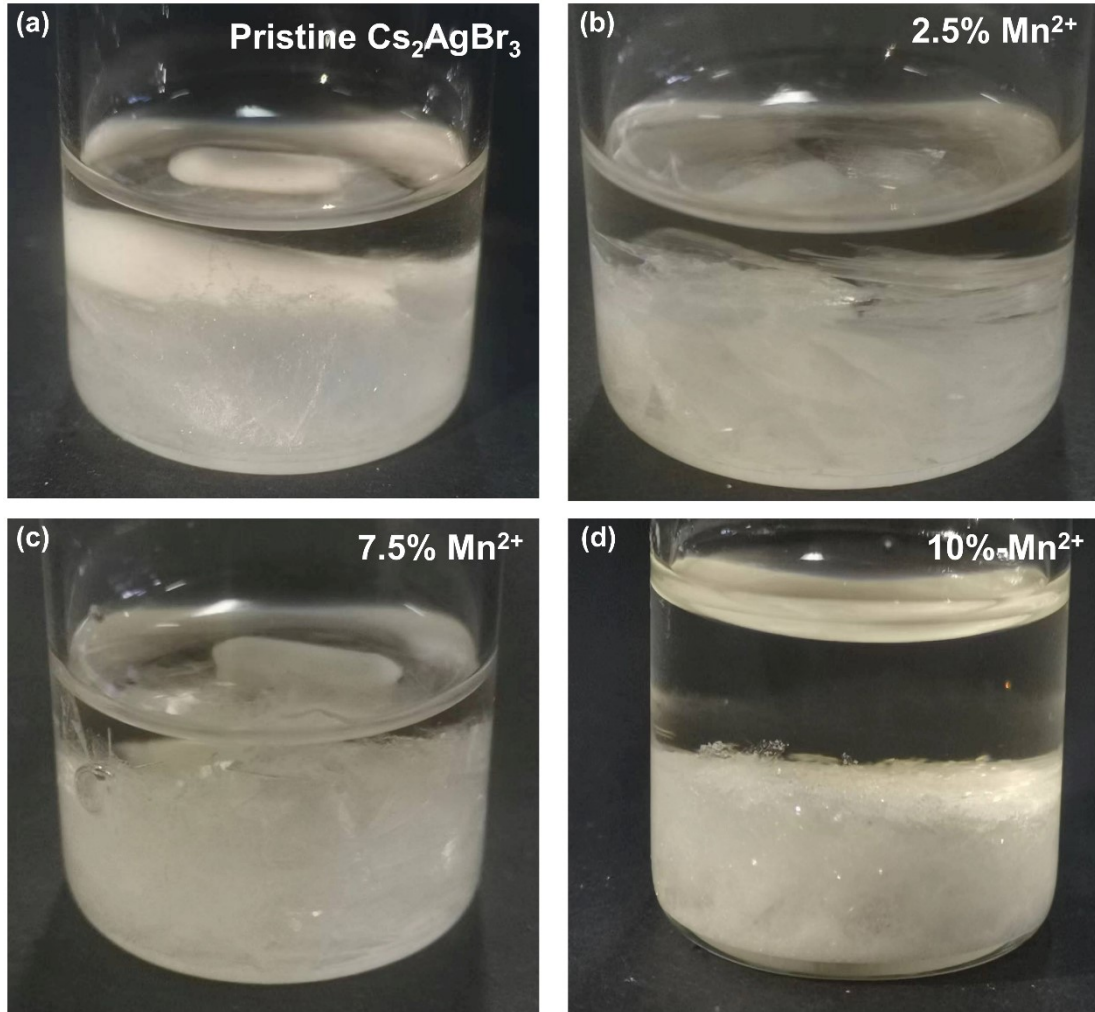

**Figure S1.** The Photographs of Cs<sub>2</sub>AgBr<sub>3</sub> crystals with different Mn<sup>2+</sup> ion doping concentrations in HBr aqueous solution. (a) pristine Cs<sub>2</sub>AgBr<sub>3</sub> crystals; The Mn<sup>2+</sup> ion

doping concentrations for other samples: (b) 2.5%; (c) 7.5%; (d) 10%.

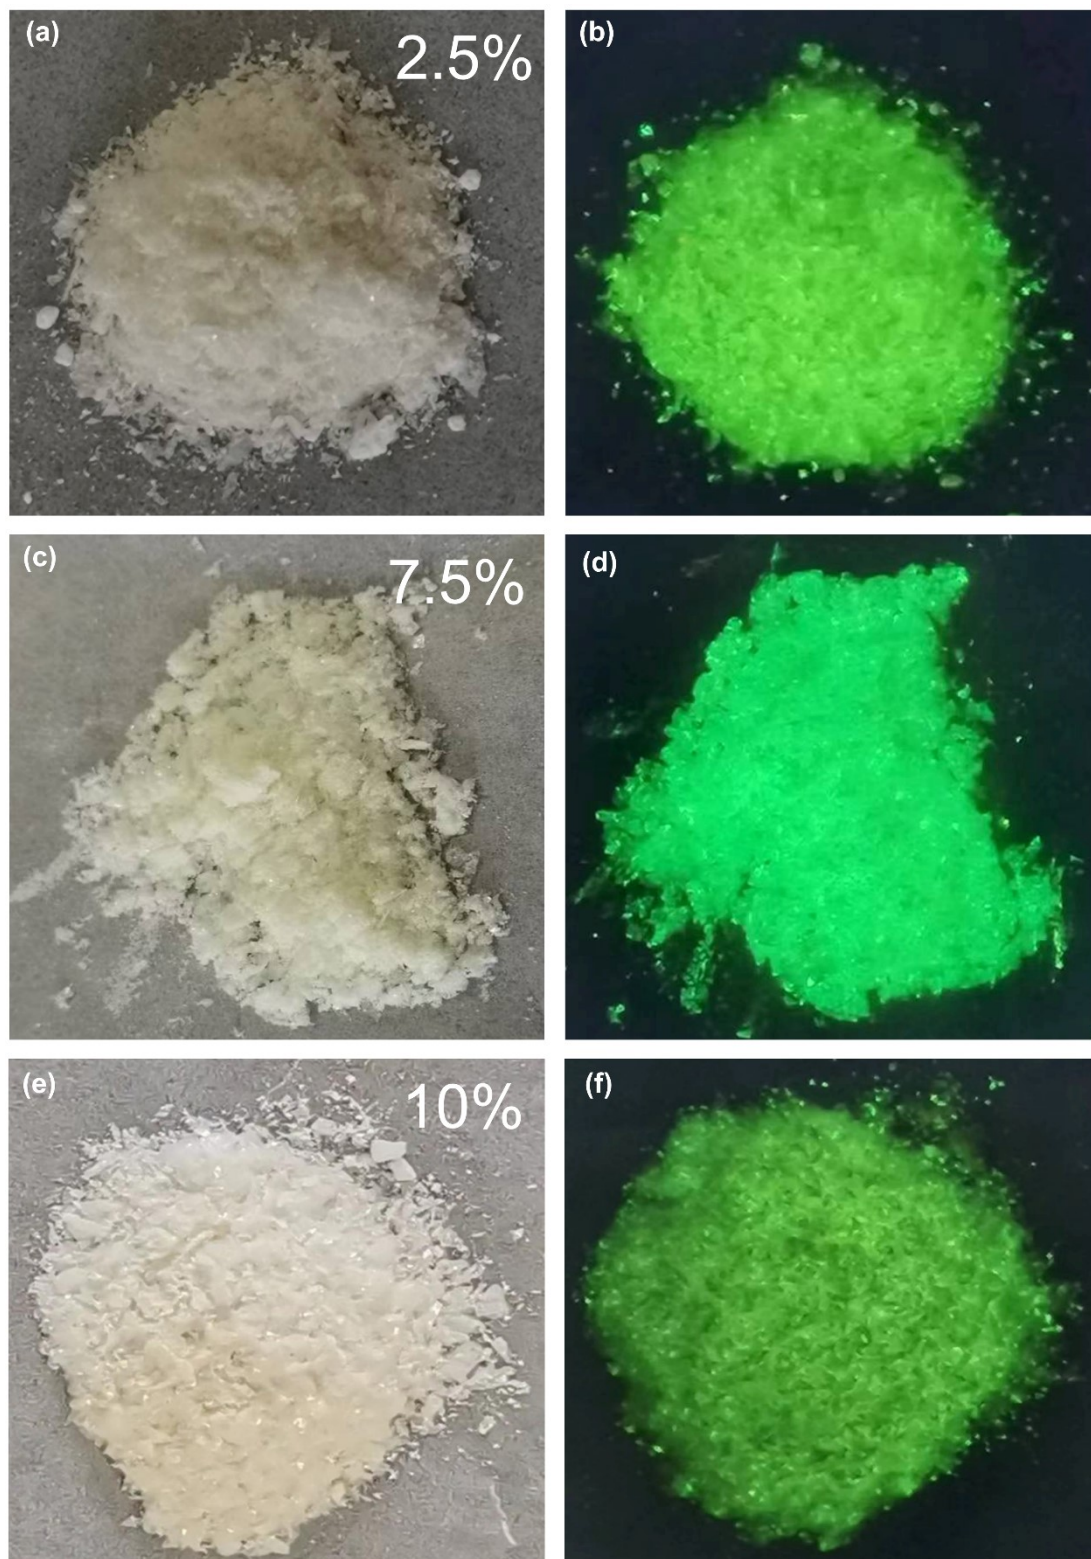

**Figure S2.** Photographs of  $\text{Cs}_2\text{AgBr}_3:\text{xMn}^{2+}$  crystals under visible light and UV light. The  $\text{Mn}^{2+}$ -doped  $\text{Cs}_2\text{AgBr}_3$  samples with different doping contents: (a, b) 2.5%; (c, d) 7.5%; (e, f) 10%.

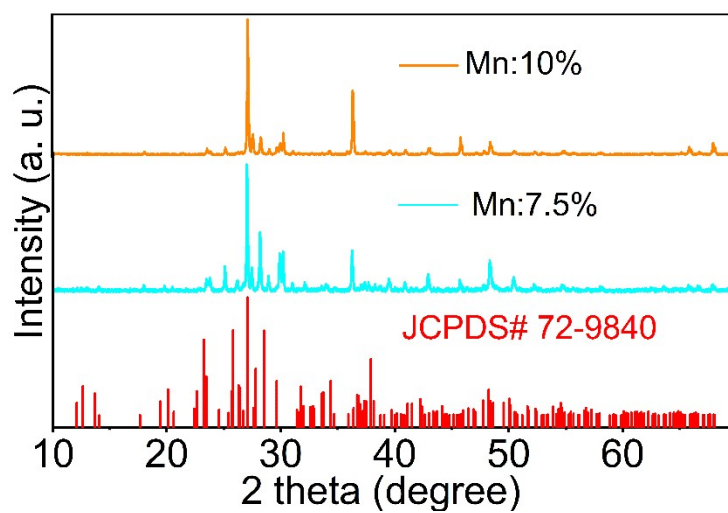

Figure S3. PXR D spectra of  $\text{Cs}_2\text{AgBr}_3:\text{xMn}^{2+}$  crystals.

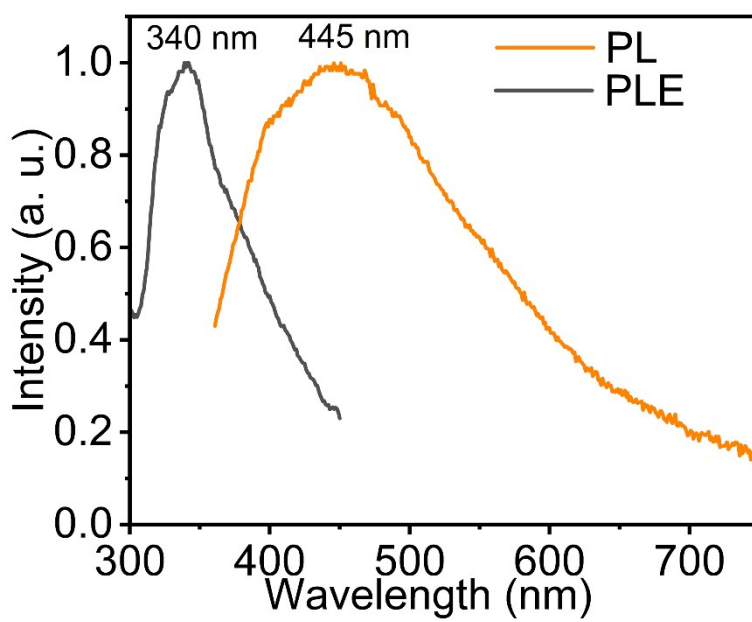

Figure S4. PL and PLE spectra of pristine  $\text{Cs}_2\text{AgBr}_3$ .



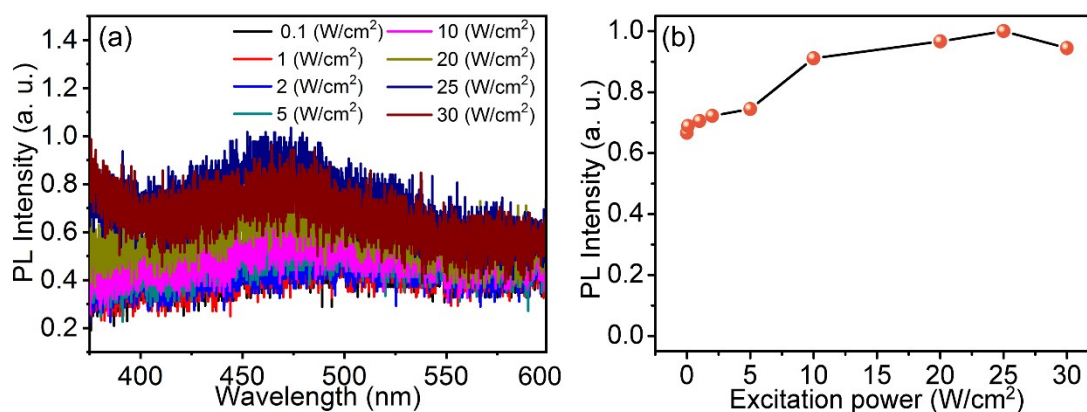

**Figure S5.** (a) Excitation power dependent PL spectra for pristine  $\text{Cs}_2\text{AgBr}_3$ .  
 (b) The corresponding plots of the PL intensity versus excitation power,  
 excitation source: 325 nm laser.

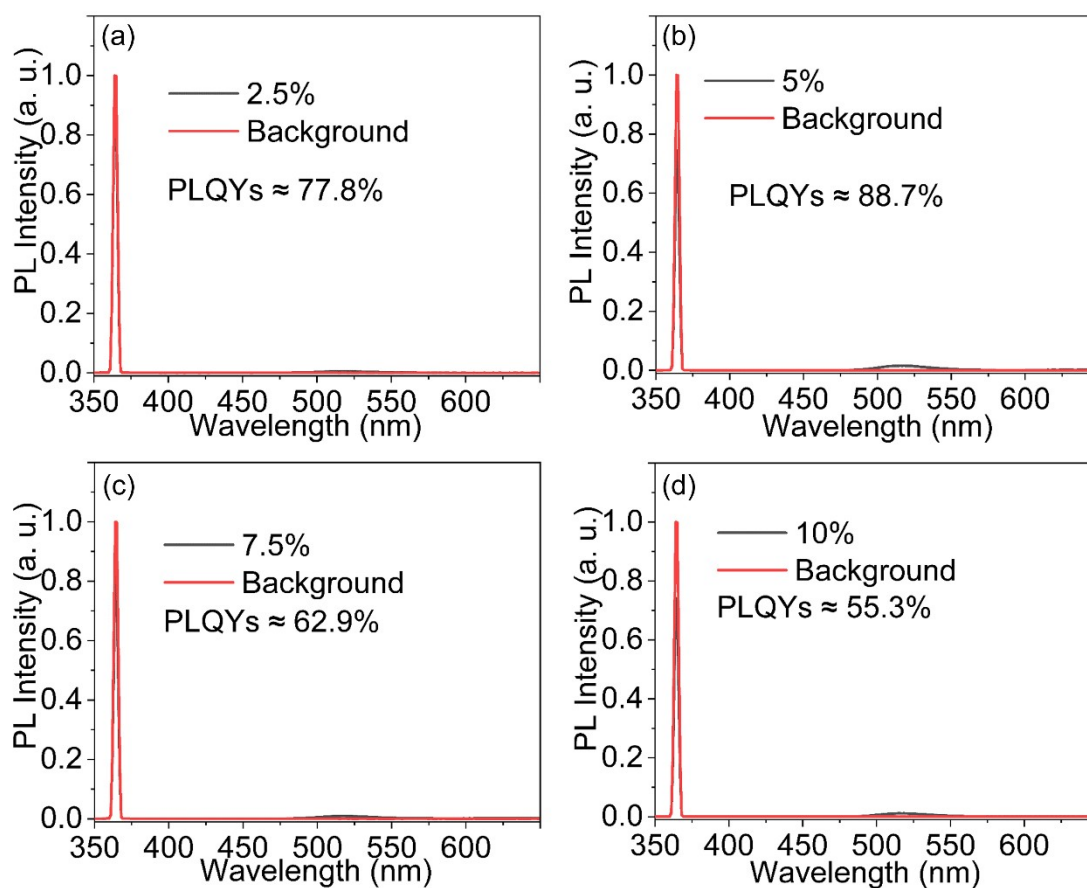

**Figure S6.** Absolute photoluminescence quantum yield measurements of (a) pristine  $\text{Cs}_2\text{AgBr}_3$  crystals and  $\text{Cs}_2\text{AgBr}_3$  crystals with different  $\text{Mn}^{2+}$  doping contents: (b) 2.5%; (c) 5%; (d) 7.5%; (e) 10%.

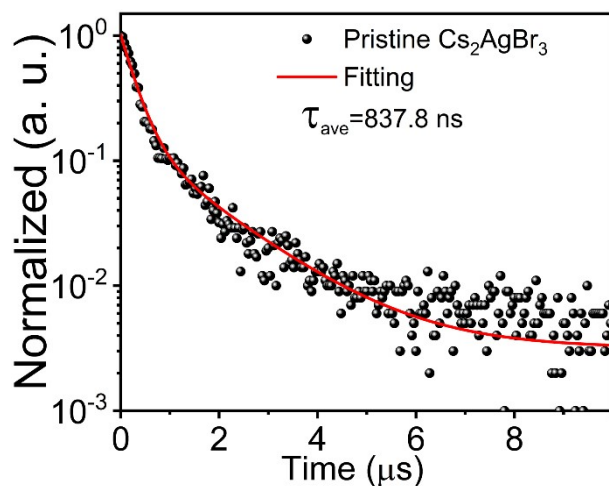

Figure S7. Time-resolved PL decay curve of pristine  $\text{Cs}_2\text{AgBr}_3$ .

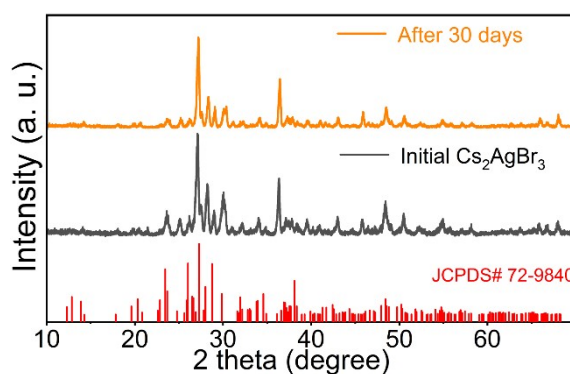

Figure S8. PXRD spectra of  $\text{Cs}_2\text{AgBr}_3:5\%\text{Mn}^{2+}$  crystal when it was exposed in air for 30 days.

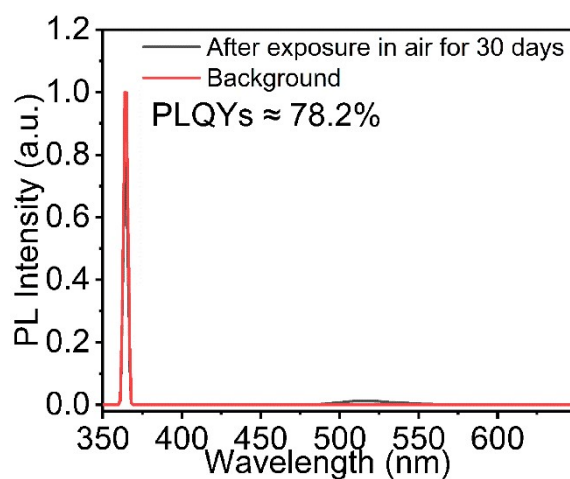

Figure S9. PLQYs of  $\text{Cs}_2\text{AgBr}_3:5\%\text{Mn}^{2+}$  crystal when it was exposed in air for 30 days.



**Table S2.** Performance comparisons of metal halide perovskite-based scintillators.

| Materials                                                                        | Maximum emission (nm) | Detection limits (nGy <sub>air</sub> /s) | Decay time (excited source)          | Resolution (lp/mm) | Ref.               |
|----------------------------------------------------------------------------------|-----------------------|------------------------------------------|--------------------------------------|--------------------|--------------------|
| Cs <sub>2</sub> Ag <sub>0.6</sub> Na <sub>0.4</sub> In <sub>1-y</sub>            | 605-652               | 19                                       | 2800 ns (400 ns)                     | 4.3                | [1] <sup>7</sup>   |
| Bi <sub>y</sub> Cl <sub>6</sub>                                                  |                       |                                          |                                      | MFT=0.2            |                    |
| Rb <sub>2</sub> AgBr <sub>3</sub>                                                | 480                   | 19                                       | 5.31 ns ( <sup>22</sup> Na, 511 keV) | 10.2               | [2] <sup>8</sup>   |
|                                                                                  |                       |                                          |                                      | MFT=0.2            |                    |
| (C <sub>8</sub> H <sub>17</sub> NH <sub>3</sub> ) <sub>2</sub> SnBr <sub>4</sub> | 596                   | /                                        | 3340 ns (350 nm)                     | 200 μm (5 lp/mm)   | [3] <sup>9</sup>   |
| Cs <sub>3</sub> Cu <sub>2</sub> I <sub>5</sub> :Mn                               | 450 and 565           | 49                                       | /                                    | 11.8               | [4] <sup>10</sup>  |
| Cs <sub>3</sub> Cu <sub>2</sub> I <sub>5</sub>                                   | 445                   | 48.6                                     | 969±9.6 ns                           | 17                 | [5] <sup>11</sup>  |
|                                                                                  |                       |                                          |                                      | MFT=0.2            |                    |
| Cs <sub>3</sub> Cu <sub>2</sub> I <sub>5</sub>                                   | 525                   | 81.7                                     | 108500 ns                            | 9.6                | [6] <sup>12</sup>  |
|                                                                                  |                       |                                          |                                      | MFT=0.2            |                    |
| (PPN) <sub>2</sub> SbCl <sub>5</sub>                                             | 635                   | 191.4                                    | 4100 ns (635 nm)                     | /                  | [7] <sup>13</sup>  |
| Cs <sub>4</sub> MnBi <sub>2</sub> Cl <sub>12</sub>                               | 610                   | /                                        | 49000 ns                             | /                  | [8] <sup>14</sup>  |
| (C <sub>38</sub> H <sub>34</sub> P <sub>2</sub> )MnBr <sub>4</sub>               | 517                   | 72.8                                     | 318000 ns                            | 322 μm             | [9] <sup>15</sup>  |
| CsCu <sub>2</sub> I <sub>3</sub>                                                 | 570                   | /                                        | ~1186 ns                             | /                  | [10] <sup>16</sup> |
| Cs <sub>2</sub> CdBr <sub>2</sub> Cl <sub>2</sub>                                | 495                   | 17.82                                    | 70740 ns                             | 12.3               | [12] <sup>17</sup> |
| (TPPen) <sub>2</sub> Mn <sub>0.9</sub> Zn <sub>0.1</sub> Br <sub>4</sub>         | 515                   | 204.1                                    | 298040 ns                            | 11.2               | [13] <sup>18</sup> |
| Cs <sub>2</sub> HfCl <sub>6</sub>                                                | 427 and 447           | 55                                       | 4860 and 12290 ns                    | 11.2               | [14] <sup>19</sup> |
| Cs <sub>2</sub> AgBr <sub>3</sub> :Mn                                            | 519                   | 478.8                                    | 255.2 μs                             | 24                 | This work          |

## References

1. S. Grimme, J. Antony, S. Ehrlich and H. Krieg, *J. Chem. Phys.*, 2010, **132**, 154104.
2. G. Kresse and J. Furthmüller, *Phys. Rev. B*, 1996, **54**, 11169-11186.
3. H. Niu, Z. Zhang, X. Wang, X. Wan, C. Shao and Y. Guo, *Adv. Funct. Mater.*, 2020, **31**, 2008533.
4. J. P. Perdew, K. Burke and M. Ernzerhof, *Phys. Rev. Lett.*, 1996, **77**, 3865-3868.
5. V. Wang, N. Xu, J.-C. Liu, G. Tang and W.-T. Geng, *Comput. Phys. Commun.*, 2021, **267**, 108033.
6. K. Momma and F. Izumi, *J. Appl. Crystallogr.*, 2008, **41**, 653-658.
7. W. Zhu, W. Ma, Y. Su, Z. Chen, X. Chen, Y. Ma, L. Bai, W. Xiao, T. Liu, H. Zhu, X. Liu, H. Liu, X. Liu and Y. Yang, *Light: Sci. Appl.*, 2020, **9**, 112.
8. M. Zhang, X. Wang, B. Yang, J. Zhu, G. Niu, H. Wu, L. Yin, X. Du, M. Niu, Y. Ge, Q. Xie, Y. Yan and J. Tang, *Adv. Funct. Mater.*, 2021, **31**, 2007921.
9. J. Cao, Z. Guo, S. Zhu, Y. Fu, H. Zhang, Q. Wang and Z. Gu, *ACS Appl. Mater. Interfaces*, 2020, **12**, 19797-19804.
10. B. Wang, X. Ouyang, X. He, Z. Deng, Y. Zhou and P. Li, *Adv. Opt. Mater.*, 2023, **11**, 2300388.
11. J.-X. Wang, X. Wang, J. Yin, L. Gutiérrez-Arzaluz, T. He, C. Chen, Y. Han, Y. Zhang, O. M. Bakr, M. Eddaoudi and O. F. Mohammed, *ACS Energy Lett.*, 2021, **7**, 10-16.
12. Q. Zhou, J. Ren, J. Xiao, L. Lei, F. Liao, H. Di, C. Wang, L. Yang, Q. Chen, X. Yang, Y. Zhao and X. Han, *Nanoscale*, 2021, **13**, 19894-19902.
13. Q. He, C. Zhou, L. Xu, S. Lee, X. Lin, J. Neu, M. Worku, M. Chaaban and B. Ma, *ACS Mater. Lett.*, 2020, **2**, 633-638.
14. J.-H. Wei, J.-F. Liao, X.-D. Wang, L. Zhou, Y. Jiang and D.-B. Kuang, *Matter*, 2020, **3**, 892-903.
15. L.-J. Xu, X. Lin, Q. He, M. Worku and B. Ma, *Nat. Commun.*, 2020, **11**, 4329.
16. S. Cheng, A. Beitlerova, R. Kucerkova, E. Mihokova, M. Nikl, Z. Zhou, G. Ren and Y. Wu, *ACS Appl. Mater. Interfaces*, 2021, **13**, 12198-12202.
17. H. Xu, W. Liang, Z. Zhang, C. Cao, W. Yang, H. Zeng, Z. Lin, D. Zhao and G. Zou, *Adv. Mater.*, 2023, **35**, 2300136.
18. J. Jin, K. Han, Y. Hu and Z. Xia, *Adv. Opt. Mater.*, 2023, **11**, 2300330.
19. F. Zhang, Y. Zhou, Z. Chen, X. Niu, H. Wang, M. Jia, J. Xiao, X. Chen, D. Wu, X. Li, Z. Shi and C. Shan, *Laser Photonics Rev.*, 2023, **17**, 2200848.
